# Supplementary material
Source: PubMed Central journal article supplement (PMC4155418)
Supplement: Supp_Fig3.pdf [file Supp_Fig3.pdf]

### EMT-related genes

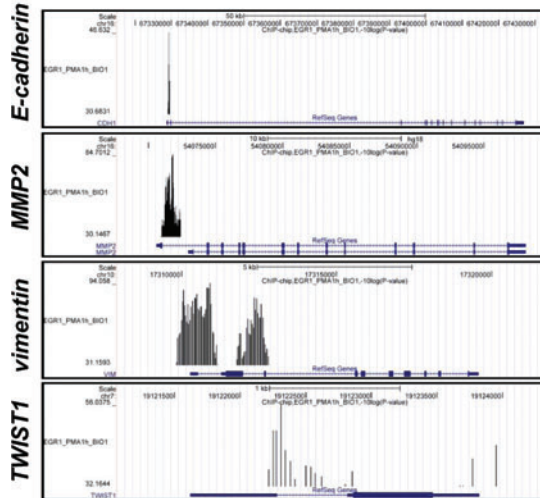

### Growth factor genes

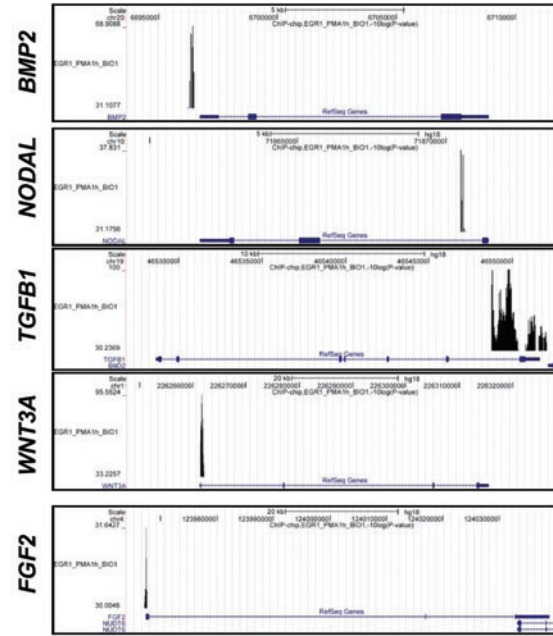

### Extra-embryonic endoderm and/or definitive-endoderm lineage-associated genes

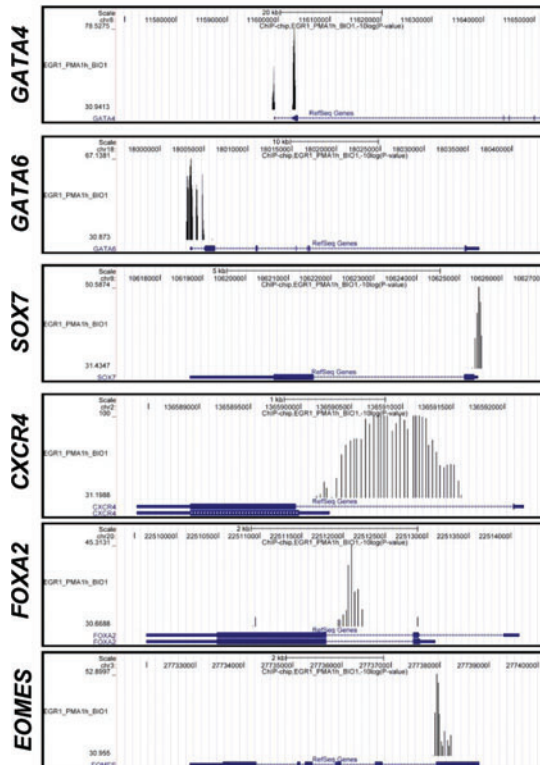

### Pluripotency-associated genes

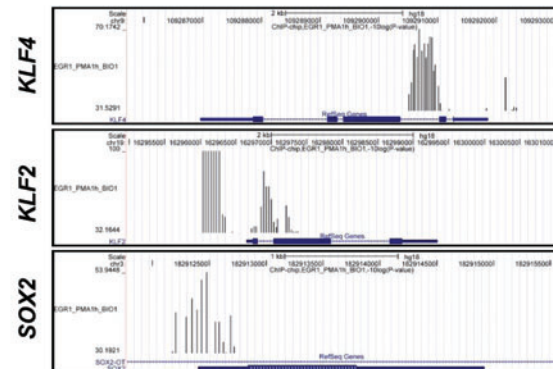

**SUPPLEMENTARY FIG. S3.** The EGR-1 binding to the promoter and intragenic regions of a number of genes in human THP-1 cells, provided by the FANTOM 4 database (<http://fantom.gsc.riken.jp/4/>) [47].
