# Supplementary material
Source: PubMed Central journal article supplement (PMC4155418)
Supplement: Supp_Table1.pdf [file Supp_Table1.pdf]

SUPPLEMENTARY TABLE S1. A LIST OF SPECIFIC PRIMERS USED FOR  
 QUANTITATIVE REVERSE TRANSCRIPTION- POLYMERASE CHAIN REACTION  
 OR CHROMATIN IMMUNOPRECIPITATION-QUANTITATIVE POLYMERASE CHAIN REACTION

| <i>Gene</i>       | <i>Forward primer</i>    | <i>Reverse primer</i>   |
|-------------------|--------------------------|-------------------------|
| <i>SNAIL</i>      | CCTCCCTGTCAGATGAGGAC     | CCAGGCTGAGGTATTCCTTG    |
| <i>SLUG</i>       | GGGGAGAAGCCTTTTTCTTG     | TCCTCATGTTTGTGCAGGAG    |
| <i>TWIST</i>      | GGAGTCCGCAGTCTTACGAG     | TCTGGAGGACCTGGTAGAGG    |
| <i>FOXC2</i>      | GCCTAAGGACCTGGTGAAGC     | TTGACGAAGCACTCGTTGAG    |
| <i>VIMENTIN</i>   | GAGAACTTTGCCGTTGAAGC     | GCTTCCTGTAGGTGGCAATC    |
| <i>EGR1</i>       | GGCAGGGAGTGATGATTTG      | GCTCAGCTCAGCCCTCTT      |
| <i>SOX7</i>       | ACGCCGAGCTCAGCAAGAT      | TCCACGTACGGCCTCTTCTG    |
| <i>SOX17</i>      | GGCGCAGCAGAATCCAGA       | CCACGACTTGCCCAGCAT      |
| <i>EOMES</i>      | CGGCCTCTGTGGCTCAA        | AAGGAAACATGCGCCTGC      |
| <i>GATA4</i>      | TCCAAACCAGAAAACGGAAGC    | GCCCGTAGTGAGATGACAGG    |
| <i>GATA6</i>      | GCGGGCTCTACAGCAAGATG     | ACAGTTGGCACAGGACAATCC   |
| <i>GSC</i>        | GAGGAGAAAGTGGAGGTCTGGTT  | CTCTGATGAGGACCGCTTCTG   |
| <i>MSI1</i>       | GAGACTGACGCGCCCCAGCC     | CGCCTGGTCCATGAAAGTGACG  |
| <i>SOX9</i>       | AATGGAGCAGCGAAATCAAC     | CAGAGAGATTTAGCACACTGATC |
| <i>MAP2</i>       | GTGACAAGGAGTTTCAAACAGGAA | CTGATGGATAACTCTGTGCGAGA |
| <i>Nestin</i>     | CCCTGACCACTCCAGTTTAG     | CCTCTATGGCTGTTTCTTTCTC  |
| <i>PAX3</i>       | TTGCAATGGCCTCTCAC        | AGGGGAGAGCGCGTAATC      |
| <i>ChIP-SNAIL</i> | TCGCTTCCCTCCCCAGTGAT     | TGGAGAGCGTGGCATTGAC     |
