# Supplementary material
Source: PubMed Central journal article supplement (PMC4155418)
Supplement: Supp_Table2.pdf [file Supp_Table2.pdf]

SUPPLEMENTARY TABLE S2. A LIST OF PRIMARY AND SECONDARY ANTIBODIES USED IN THIS STUDY

| <i>Primary antibody</i>   | <i>Immunogen</i> | <i>Company</i>    | <i>Dilution ratio</i> |
|---------------------------|------------------|-------------------|-----------------------|
| E-cadherin                | Rabbit IgG       | Cell Signaling    | 1:400                 |
| VIMENTIN                  | Mouse IgG        | Sigma             | 1:200                 |
| EGR1                      | Rabbit IgG       | Cell Signaling    | 1:400 or 1:1,000      |
| SSEA-1                    | Mouse IgM        | Santa Cruz        |                       |
| NANOG                     | Rabbit IgG       | Cell Signaling    | 1:100                 |
| H3K9ac                    | Mouse IgG        | MAB Institute     | 1:100                 |
| <i>Secondary antibody</i> |                  | <i>Company</i>    | <i>Dilution ratio</i> |
| Anti-mouse IgG Alexa 488  |                  | Life Technologies | 1:500                 |
| Anti-mouse IgM Alexa 555  |                  | Life Technologies | 1:500                 |
| Anti-rabbit IgG Alexa 647 |                  | Life Technologies | 1:500                 |

IgG, immunoglobulin G; IgM, immunoglobulin M.
