# Supplementary material
Source: PubMed Central journal article supplement (PMC4155418)
Supplement: Supp_Table3.pdf [file Supp_Table3.pdf]

SUPPLEMENTARY TABLE S3. A LIST OF NOMINATED GENES AS THE CANDIDATES FOR PROTEIN KINASE C DOWNSTREAM GENES

| <i>Gene symbol</i> | <i>Gene name</i>                                                                  | <i>PMA</i> <sup>a</sup> | <i>PMA + GFX</i> <sup>a</sup> | <i>Genbank accession</i> |
|--------------------|-----------------------------------------------------------------------------------|-------------------------|-------------------------------|--------------------------|
| <i>EGR3</i>        | Early growth response 3                                                           | 3.7282772               | -2.463486                     | NM_004430                |
| <i>EGR4</i>        | Early growth response 4                                                           | 3.5081131               | -3.926553                     | NM_001965                |
| <i>CLRN1</i>       | Clarin 1                                                                          | 3.0495627               | -0.5069914                    | NM_174878                |
| <i>NPAS4</i>       | Neuronal PAS domain protein 4                                                     | 2.8849869               | -1.0330967                    | NM_178864                |
| <i>C19orf76</i>    | Chromosome 19 open reading frame 76                                               | 2.6478996               | -0.13748486                   | NM_001101340             |
| <i>CKAP2</i>       | Cytoskeleton-associated protein 2                                                 | 2.6275656               | -0.22221582                   | AK096227                 |
| <i>EGR2</i>        | Early growth response 2                                                           | 2.531788                | -2.0751922                    | NM_000399                |
| <i>FCGR1B</i>      | Fc fragment of IgG, high affinity Ib, receptor (CD64)                             | 2.4923675               | -0.53094006                   | NM_001017986             |
| <i>KDR</i>         | Kinase insert domain receptor<br>(a type III receptor tyrosine kinase)            | 2.48017                 | -0.07435926                   | NM_002253                |
| <i>HOXD11</i>      | Homeobox D11                                                                      | 2.476493                | -0.3522482                    | NM_021192                |
| <i>FOS</i>         | FBJ murine osteosarcoma viral oncogene homolog                                    | 2.4373233               | -2.4828014                    | NM_005252                |
| <i>MAGI2-IT1</i>   | MAGI2 intronic transcript 1 (nonprotein coding)                                   | 2.372587                | -0.2563653                    | AF521131                 |
| <i>BHLHE40</i>     | Basic helix-loop-helix family, member e40                                         | 2.3501017               | -0.6645338                    | NM_003670                |
| <i>FOSB</i>        | FBJ murine osteosarcoma viral oncogene homolog B                                  | 2.271804                | -1.2975746                    | NM_006732                |
| <i>DUSP2</i>       | Dual specificity phosphatase 2                                                    | 2.2635858               | -1.1383896                    | NM_004418                |
| <i>TSPY2</i>       | Testis-specific protein, Y-linked 2                                               | 2.118348                | -0.6464141                    | NM_022573                |
| <i>RRAD</i>        | Ras related associated with diabetes                                              | 2.105308                | -0.32972637                   | NM_004165                |
| <i>JUNB</i>        | Jun B proto-oncogene                                                              | 1.8869429               | -1.1418382                    | NM_002229                |
| <i>IL7</i>         | Interleukin 7                                                                     | 1.8681451               | -0.58947295                   | AB102885                 |
| <i>ZFP36</i>       | Zinc finger protein 36, C3H type, homolog (mouse)                                 | 1.8561277               | -1.2024502                    | NM_003407                |
| <i>GADD45B</i>     | Growth arrest and DNA damage inducible, beta                                      | 1.8080248               | -0.62991303                   | NM_015675                |
| <i>THBS1</i>       | Thrombospondin 1                                                                  | 1.7498387               | -0.78193045                   | NM_003246                |
| <i>EGR1</i>        | Early growth response 1                                                           | 1.7340802               | -1.5841302                    | NM_001964                |
| <i>CXCL1</i>       | Chemokine (C-X-C motif) ligand 1<br>(melanoma growth stimulating activity, alpha) | 1.6786776               | -1.4086958                    | NM_001511                |
| <i>ARC</i>         | Activity-regulated cytoskeleton-associated protein                                | 1.5827032               | -1.2997742                    | NM_015193                |
| <i>JUN</i>         | Jun proto-oncogene                                                                | 1.4786431               | -0.90563804                   | NM_002228                |
| <i>GFAP</i>        | Glial fibrillary acidic protein                                                   | -0.1399285              | 2.246711                      | NM_001242376             |
| <i>FLJ40292</i>    | Uncharacterized LOC643210                                                         | -0.3621338              | 2.7596207                     | NR_024341                |

<sup>a</sup>The expression levels were normalized from all DNA microarray data set (each triplicate) in the cell treated with PMA or PMA + GFX. Fold change (log10) was indicated as mean value calculated from the normalized expression levels. PMA, phorbol 12-myristate 13-acetate; GFX, GF109203X.
